# Supplementary material for: A New Mechanism of the Selective Photodegradation of Antibiotics in the Catalytic System Containing TiO2 and the Inorganic Cations
Source: MDPI journal article supplement (doi:10.3390/ijms22168696), 2021-08-13
Supplement: s1 [file s1]

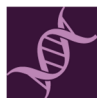

Article

# A New Mechanism of the Selective Photodegradation of Antibiotics in the Catalytic System Containing TiO<sub>2</sub> and the Inorganic Cations

Wojciech Baran <sup>1</sup>, Mateusz Cholewiński <sup>1</sup>, Andrzej Sobczak <sup>1</sup> and Ewa Adamek <sup>1,\*</sup>

<sup>1</sup> Department of General and Analytical Chemistry, Faculty of Pharmaceutical Sciences in Sosnowiec, Medical University of Silesia in Katowice; Jagiellońska 4, 41-200 Sosnowiec, Poland; wbaran@sum.edu.pl (W.B.); mateochol@tlen.pl (M.C.); asobczak@sum.edu.pl (A.S.); eadamek@sum.edu.pl (E.A);

\* Correspondence: e-mail: eadamek@sum.edu.pl; tel: +48 32 364 15 65

## Tables and figures list in Supplementary Materials

**Table S1.** Characteristics of the investigated pharmaceuticals used in screening tests.

**Table S2.** Chemical composition of the synthetic municipal wastewater (ISO 9887:1992(E)).

**Table S3.** Characteristics of the investigated SNs

**Table S4.** Characteristics of the radicals and cations

**Table S5.** Concentrations of substances used in studies of the photocatalytic degradation of SNs

**Table S6.** Detailed data for the UPLC procedure (gradient table)

**Figure S1a.** TOF/BPI chromatograms of SFF solution irradiated for 0, 30 and 90 s in the presence of a  $\text{TiO}_2/\text{FeCl}_3$  mixture.

**Figure S1b.** TOF/BPI chromatograms of SFF solution irradiated for 15 and 40 min separately in the presence of  $\text{TiO}_2$  or  $\text{FeCl}_3$ .

**Figure S1c.** TOF/BPI chromatograms of SAD solution irradiated for 2 and 10 min in the presence of a  $\text{TiO}_2/\text{FeCl}_3$  mixture.

**Figure S1d.** TOF/BPI chromatograms of STZ solution irradiated for 2 and 10 min in the presence of a  $\text{TiO}_2/\text{FeCl}_3$  mixture

**Figure S2.** Changes in the concentration of SFF solution in the presence of a mixture of  $\text{TiO}_2$  (0.5 g/l)/ $\text{FeCl}_3$  (1.0 mmol/l) in the dark and irradiated with UVA

**Figure S3.** Effect of pH on the photodegradation rate of SFF (0.1 mmol/l) in the presence of a  $\text{TiO}_2$  (0.5 g/l)/ $\text{FeCl}_3$  (1.0 mmol/l) mixture

**Figure S4.** Effect of the initial concentration of SFF on the degree of sorption (before UVA irradiation) in the presence of a  $\text{TiO}_2$  (0.5 g/l)/ $\text{FeCl}_3$  (1.0 mmol/l) mixture

**Figure S5.** Effect of the amount of  $\text{TiO}_2$  on the sorption of SFF (0.1 mmol/l) in the presence of  $\text{FeCl}_3$  (1.0 mmol/l).

**Figure S6.** Changes in the concentration of SNs ( $C_0$  0.1 mmol/l) and  $\text{Fe}^{3+}$  ( $C_0$  1.0 mmol/l) during the photodegradation conducted in the presence of a  $\text{TiO}_2/\text{FeCl}_3$  mixture at pH  $3.0 \pm 0.1$ .

**Figure S7.** Comparison of the degradation rate constants of the selected SNs (0.1 mmol/l) during the Fenton process (0.15 mmol  $\text{FeSO}_4/\text{l}$  and 0.5 mmol  $\text{H}_2\text{O}_2/\text{l}$ ) and Fenton-like reactions (photo Fenton, 1.0 mmol  $\text{FeCl}_3/\text{l}$  and 2.0 mmol  $\text{H}_2\text{O}_2/\text{l}$ )

**Figure S8.** Effect of the  $\text{SO}_4^{2-}$  concentration on the sorption of SFF (0.1 mmol/l) on the catalytic system (0.5 g  $\text{TiO}_2/\text{l}$  /1.0 mmol  $\text{FeCl}_3/\text{l}$ ) at pH  $3.0 \pm 0.1$

**Figure S9.** Effect of the pH on the dissociation and the concentration of molecular form of SNs (0.1 mmol/l) in aqueous solution: cationic form ( $\text{SH}_2^+$ ) – solid line, neutral form ( $\text{SH}$ ) – dashed line, anionic form ( $\text{S}^-$ ) – dotted line

**Figure S10.** Relationship between the photodegradation rate of SNs (0.1 mmol/l) in the presence of a  $\text{TiO}_2$ (0.5 g/l)/ $\text{FeCl}_3$ (1.0 mmol/l) mixture and their dissociation constants ( $K_a$ )

**Figure S11.** Effect of the pH on the initial rate of SFF photodegradation (0.1 mmol/l) in the presence of  $\text{TiO}_2$  (0.5 g/l) or a  $\text{TiO}_2$ (0.5 g/l)/t-But (10 mmol/l) mixture

**Figure S12.** Test stand for the photocatalytic experiments under aerobic and anaerobic conditions, (a) UVa lamps; (b) a glass beaker (5000 ml); (c) a glass beaker (250 ml) (d) SN solution (150 ml, 0.1 mmol/l) with the selected catalyst system; (e) a glass tube (drain)

**Figure S13.** MSMS spectrum and a possible formula of compound with m/z 196.1086 Da occurred in SFF solution after irradiation for 90 s in the presence of a  $\text{TiO}_2/\text{FeCl}_3$  mixture

**Table S1.** Characteristics of the investigated pharmaceuticals used in screening tests.

| Name, CAS number                     | Manufacturer  | Chemical purity | Structural formula <sup>1)</sup>                                                      |
|--------------------------------------|---------------|-----------------|---------------------------------------------------------------------------------------|
| Sulfanilamide<br>63-74-1             | Sigma-Aldrich | >98.0%          | 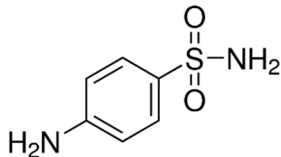   |
| Sulfadiazine sodium salt<br>547-32-0 | Sigma-Aldrich | ≥98.0%          |    |
| Sulfathiazole<br>72-14-0             | Sigma-Aldrich | ≥99.0%          |    |
| Sulfamethazine<br>57-68-1            | Sigma-Aldrich | ≥99.0%          |   |
| Sulfamethoxazole<br>723-46-6         | Sigma-Aldrich | ≥99.0%          |   |
| Sulfisoxazole<br>127-69-5            | Sigma-Aldrich | ≥99.0%          |   |
| Trimethoprim<br>738-70-5             | Sigma-Aldrich | ≥99.0%          |  |
| Metronidazole<br>443-48-1            | Supelco       |                 |  |

|                                              |               |                                   |                                                                                       |
|----------------------------------------------|---------------|-----------------------------------|---------------------------------------------------------------------------------------|
| Ifosfamide<br>3778-73-2                      | Sigma-Aldrich | ≥98.0%                            | 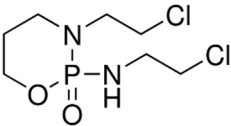   |
| 6-Mercaptopurine<br>monohydrate<br>6112-76-1 | Sigma-Aldrich | 98.0%                             |    |
| Gentamicin sulfate<br>salt<br>1405-41-0      | Sigma-Aldrich | ≥590 µg gentamicin<br>base per mg |    |
| Cefuroxime sodium<br>salt<br>56238-63-2      | Supelco       |                                   |    |
| Doxycycline hyclate<br>24390-14-5            | Sigma-Aldrich | ≥93.5%                            |   |
| Ampicillin sodium<br>salt<br>69-52-3         | Sigma-Aldrich | ≥98%                              |  |

<sup>1)</sup> from the manufacturer's website<sup>2)</sup> [63]<sup>3)</sup> [64]

**Table S2.** Chemical composition of the synthetic municipal wastewater (ISO 9887:1992(E)) [62]

| Chemicals                            | Manufacturer     | Chemical purity | Concentration (mg/l) |
|--------------------------------------|------------------|-----------------|----------------------|
| Peptone from animal tissue           | Sigma-Aldrich    | -               | 160                  |
| Meat extract                         | Millipore        | -               | 110                  |
| Urea                                 | POCH (Poland)    | p.a.            | 30                   |
| K <sub>2</sub> HPO <sub>4</sub>      | POCH (Poland)    | p.a.            | 28                   |
| NaCl                                 | POCH (Poland)    | p.a.            | 7                    |
| CaCl <sub>2</sub> ·2H <sub>2</sub> O | POCH (Poland)    | p.a.            | 4                    |
| MgSO <sub>4</sub> ·7H <sub>2</sub> O | Chempur (Poland) | p.a.            | 2                    |

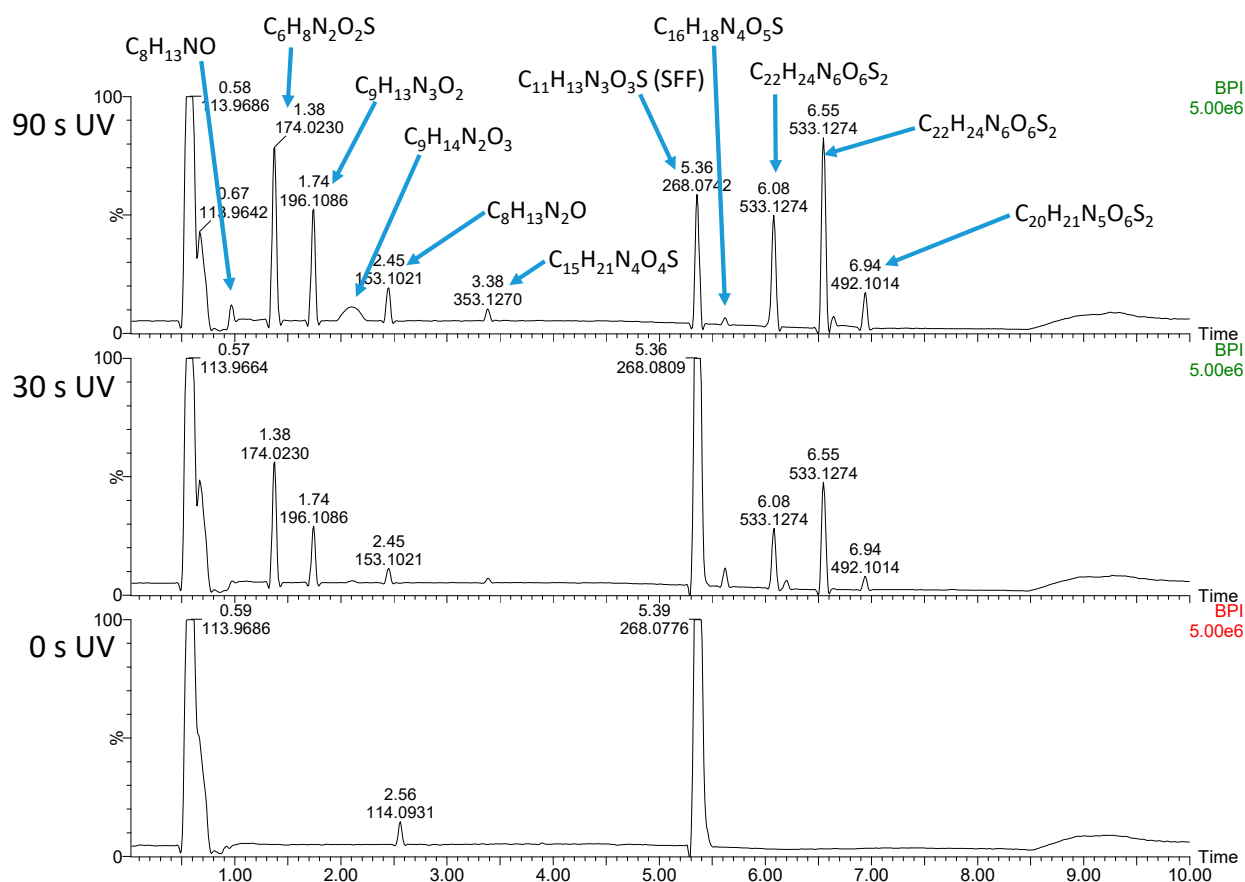**Figure S1a.** TOF/BPI chromatograms of SFF solution irradiated for 0, 30 and 90 s in the presence of a TiO<sub>2</sub>/FeCl<sub>3</sub> mixture

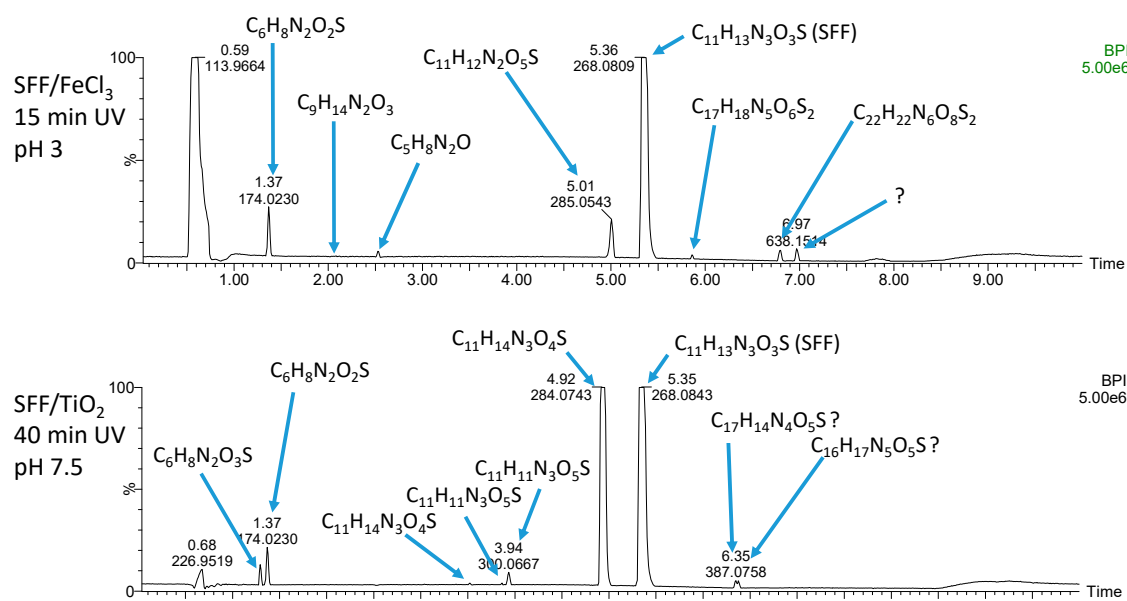

**Figure S1b.** TOF/BPI chromatograms of SFF solution irradiated for 15 and 40 min separately in the presence of TiO<sub>2</sub> or FeCl<sub>3</sub>

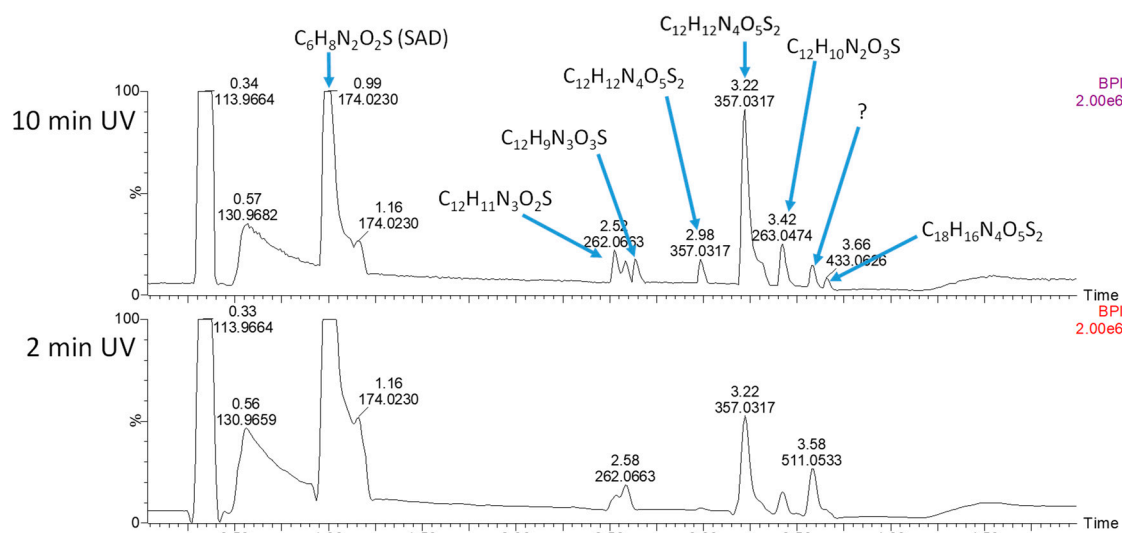

**Figure S1c.** TOF/BPI chromatograms of SAD solution irradiated for 2 and 10 min in the presence of a TiO<sub>2</sub>/FeCl<sub>3</sub> mixture

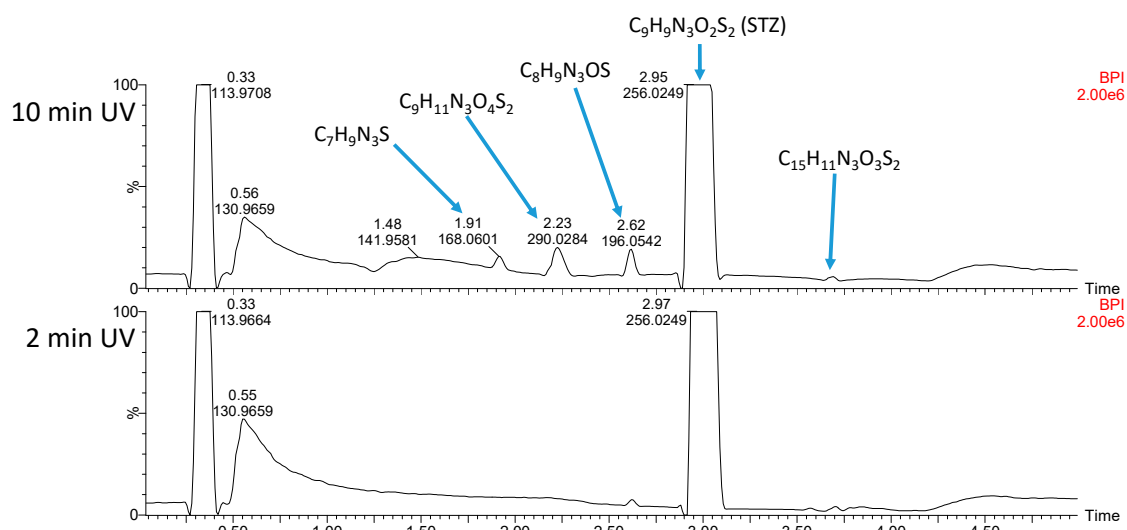

**Figure S1d.** TOF/BPI chromatograms of STZ solution irradiated for 2 and 10 min in the presence of a  $TiO_2/FeCl_3$  mixture

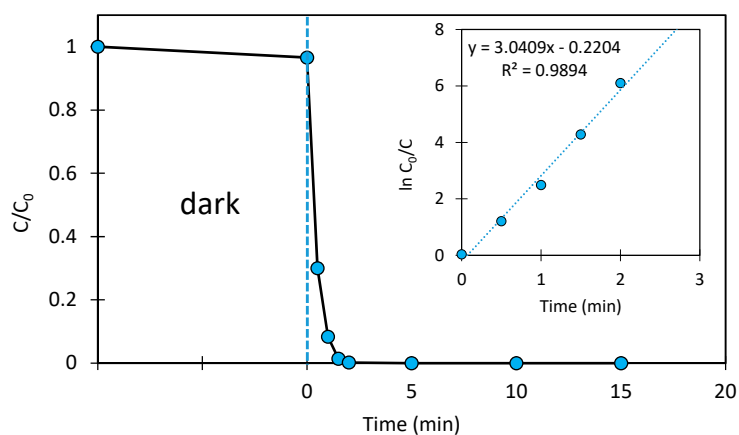

**Figure S2.** Changes in the concentration of SFF solution in the presence of a mixture of  $TiO_2$  (0.5 g/l)/ $FeCl_3$  (1.0 mmol/l) in the dark and irradiated with UVA

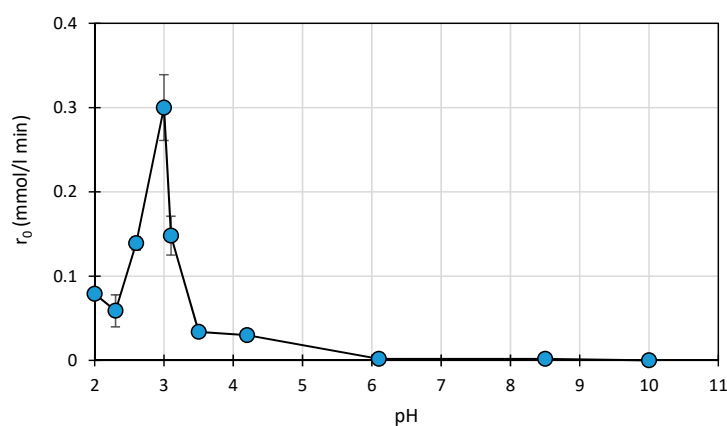

**Figure S3.** Effect of pH on the photodegradation rate of SFF (0.1 mmol/l) in the presence of a  $TiO_2$  (0.5 g/l)/ $FeCl_3$  (1.0 mmol/l) mixture

**Table S3.** Characteristics of the investigated SNs

| Abbreviation | 3D structures <sup>[65]</sup> | $pK_{a1}$ | Molar fraction |
|--------------|-------------------------------|-----------|----------------|
|--------------|-------------------------------|-----------|----------------|

| Name,<br>CAS,<br>manufacturer,<br>chemical purity          | in the text |                                                                                     | $pK_{a2}^{1)}$                             | of the molecular form<br>(SH) <sup>1)</sup><br>at pH 3 |
|------------------------------------------------------------|-------------|-------------------------------------------------------------------------------------|--------------------------------------------|--------------------------------------------------------|
| Sulfanilamide<br>63-74-1<br>Sigma-Aldrich,<br>>98.0%       | <b>SAD</b>  | 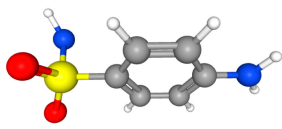   | $2.46 \pm 0.12$<br>$10.35 \pm 0.21^{[20]}$ | 0.776                                                  |
| Sulfisoxazole<br>127-69-5<br>Sigma-Aldrich,<br>≥99.0%      | <b>SFF</b>  |    | $1.69 \pm 0.27$<br>$5.00 \pm 0.00^{[20]}$  | 0.944                                                  |
| Sulfathiazole<br>72-14-0<br>Sigma-Aldrich,<br>≥99.0%       | <b>STZ</b>  |   | $2.22 \pm 0.27$<br>$7.15 \pm 0.12^{[20]}$  | 0.858                                                  |
| Sulfachlorpyridazine<br>80-32-0<br>Sigma-Aldrich,<br>99.7% | <b>SCP</b>  |  | $1.87 \pm 0.30$<br>$5.45 \pm 0.06^{[66]}$  | 0.928                                                  |
| Sulfaclozine<br>23307-72-4<br>Sigma-Aldrich,<br>99.8%      | <b>SCL</b>  |  | $\sim 2$<br>$5.5^{[28]}$                   | 0.906                                                  |

<sup>1)</sup>  $SH_2^+ \xrightleftharpoons{K_{a1}} SH \xrightleftharpoons{K_{a2}} S^-$



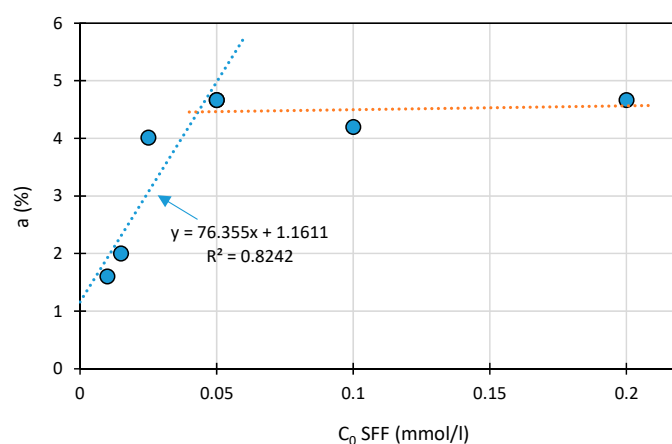

**Figure S4.** Effect of the initial concentration of SFF on the degree of sorption (before UVA irradiation) in the presence of a  $\text{TiO}_2$  (0.5 g/l)/ $\text{FeCl}_3$  (1.0 mmol/l) mixture

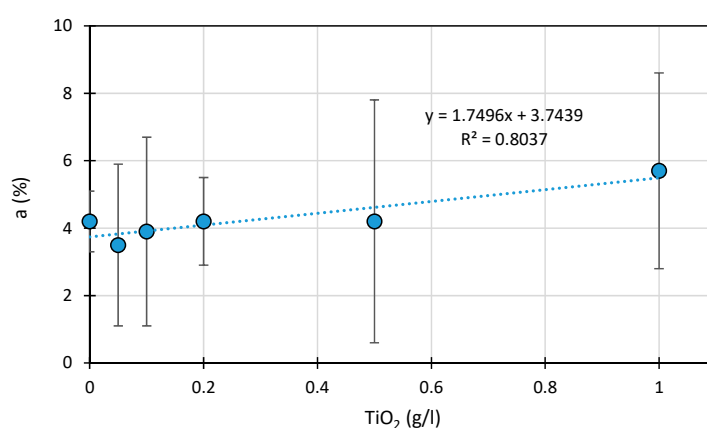

**Figure S5.** Effect of the amount of  $\text{TiO}_2$  on the sorption of SFF (0.1 mmol/l) in the presence of  $\text{FeCl}_3$  (1.0 mmol/l)

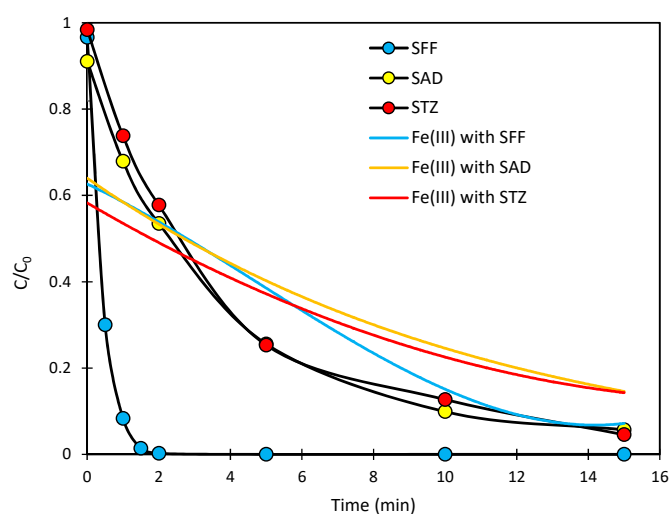

**Figure S6.** Changes in the concentration of SNs ( $C_0$  0.1 mmol/l) and  $\text{Fe}^{3+}$  ( $C_0$  1.0 mmol/l) during the photodegradation conducted in the presence of a  $\text{TiO}_2/\text{FeCl}_3$  mixture at  $\text{pH } 3.0 \pm 0.1$ .

**Table S4.** Characteristics of the radicals and cations <sup>1)</sup>

| Radical | Chemical name | Redox potential | Recombination | Reaction constant rate |
|---------|---------------|-----------------|---------------|------------------------|
|---------|---------------|-----------------|---------------|------------------------|

|                                    |                          | (V)              | constant rate<br>(mol/l s)        | with other compounds (mol/l s)                                   |
|------------------------------------|--------------------------|------------------|-----------------------------------|------------------------------------------------------------------|
| HO•                                | hydroksyl                | 2.7 [67]         | $4.7 \times 10^9$ [68]            | $9.7 \times 10^8$ (methanol) [45]                                |
|                                    |                          | 2.8 [69]         | $5.5 \times 10^9$ [45]            | $7.9 \times 10^9$ (benzene) [45]                                 |
|                                    |                          | 2.33 [70]        | $6 \times 10^9$ [43]              | $3.1 \times 10^9$ 2-butanol [45]                                 |
|                                    |                          | 2.34 [71]        | $5.2 \times 10^9$ [72]            | $1.6 \times 10^7$ (acetic acid) [45]                             |
|                                    |                          |                  | $5.3 \times 10^9$ [73]            | $8.6 \times 10^9$ (aniline) [74]                                 |
|                                    |                          |                  | $4.2 \times 10^9$ [75]            | $8.2 \times 10^9$ (sulfanilic acid) [74]                         |
|                                    |                          |                  |                                   | $1.6 \times 10^8$ (pyrimidine) [74]                              |
|                                    |                          |                  |                                   | $3.5 \times 10^9$ (isoxazole) [74]                               |
|                                    |                          |                  |                                   | $\leq 3.5 \times 10^9$ (SNs) [74]                                |
|                                    |                          |                  |                                   | $0.66 - 1.8 \times 10^{10}$ (phenol) [75]                        |
|                                    |                          |                  |                                   | $7.8 - 8.5 \times 10^9$ (SNs) [76]                               |
|                                    |                          |                  |                                   | $5.5 \times 10^9$ (SMX) [77]                                     |
|                                    |                          |                  |                                   | $10^9 - 10^{10}$ (lipid) [78]                                    |
|                                    |                          |                  |                                   | $2.8 \times 10^9 - 3.4 \times 10^{10}$ (aliphatic alcohols) [79] |
| O <sub>2</sub> •-                  | superoxide radical       | 0.94 [70,71]     | $2.33 \times 10^6$ [72]           | $2.7 \times 10^7$ (H <sub>2</sub> O <sub>2</sub> ) [80]          |
|                                    |                          | -0.33 [67,71]    |                                   | $< 10^2$ [71]                                                    |
|                                    |                          |                  |                                   | $10^5 - 10^9$ (ascorbate) [71]                                   |
| HO <sub>2</sub> •                  | hydroperoxyl             | 1.48 [71]        | $(8.3 \pm 0.7) \times 10^5$       | $1.18 - 3.05 \times 10^3$ (fatty acids) [71]                     |
|                                    |                          | 1.7 [81]         | [45]                              | $10^9 - 10^{10}$ (lipids) [78]                                   |
|                                    |                          |                  | $1.8 \times 10^6$ [43]            |                                                                  |
|                                    |                          |                  | $2.33 \times 10^6$ [72]           |                                                                  |
|                                    |                          |                  | $8.5 \times 10^5$ [73]            |                                                                  |
| Cl•                                | chlorine radical         | 2.5 [45,79]      | $1.35 \cdot 10^7$                 | $1.0 \times 10^9$ (methanol) [45]                                |
|                                    |                          | 1.36 [44]        | $8.8 \times 10^7$ [45]            | $5.0 \times 10^9$ (butanol 2) [45]                               |
|                                    |                          |                  |                                   | $2.0 \times 10^8$ (acetic acid) [45]                             |
|                                    |                          |                  |                                   | $9.0 \times 10^9$ (benzene) [45]                                 |
|                                    |                          |                  |                                   | $2.5 \times 10^8$ (phenol) [45]                                  |
| SO <sub>4</sub> •-                 | sulfate radical anion    |                  |                                   | $9.4 \times 10^2$ (SMX) [77]                                     |
|                                    |                          | 2.60 – 3.10 [79] | $7.0 \times 10^8$ [45]            | $5.6 \times 10^6 - 9.9 \times 10^7$ (alkans) [79]                |
|                                    |                          |                  | $(6.1 \pm 0.15) \times 10^8$ [82] | $5.9 \times 10^7 - 1.4 \times 10^9$ (aliphatic alcohols) [79]    |
| CH <sub>2</sub> OH•                | hydroxymethyl            | -0.75 [83]       | $5.3 \times 10^{10}$ [84]         | $6.1 \times 10^9$ (benzoquinone) [85]                            |
|                                    |                          | -0.90-1.18 [87]  |                                   | $10^4 - 10^5$ (formaldehyde) [85]                                |
| C <sub>4</sub> H <sub>8</sub> OH•  | 2-hydroxy-2-methylpropyl | 0.09 [86]        | -                                 | $1.75 \times 10^5$ (H <sub>2</sub> O <sub>2</sub> ) [88]         |
|                                    |                          |                  |                                   | $2.2 \times 10^5$ (H <sub>2</sub> O <sub>2</sub> ) [88]          |
| Fe <sup>3+</sup> /Fe <sup>2+</sup> | -                        | 0.77 [89]        | -                                 | -                                                                |
| Fe <sup>4+</sup> /Fe <sup>3+</sup> | -                        | ~3.4 [90]        | -                                 | -                                                                |
| Cu <sup>2+</sup> /Cu <sup>+</sup>  | -                        | 0.159 [89]       | -                                 | -                                                                |

|                                              |   |                       |   |   |
|----------------------------------------------|---|-----------------------|---|---|
| $\text{Cr}^{3+}/\text{Cr}^{2+}$              | - | -0.42 <sup>[89]</sup> | - | - |
| $2\text{Cr}^{3+}/\text{Cr}_2\text{O}_7^{2-}$ | - | -1.33 <sup>[89]</sup> | - | - |

<sup>1)</sup> not bonded cations, only standard values

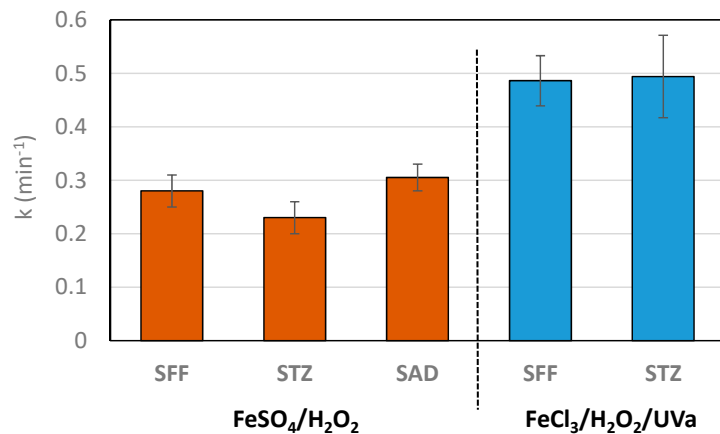

**Figure S7.** Comparison of the degradation rate constants of the selected SNs (0.1 mmol/l) during the Fenton process (0.15 mmol FeSO<sub>4</sub>/l and 0.5 mmol H<sub>2</sub>O<sub>2</sub>/l) and Fenton-like reactions (photo Fenton, 1.0 mmol FeCl<sub>3</sub>/l and 2.0 mmol H<sub>2</sub>O<sub>2</sub>/l)

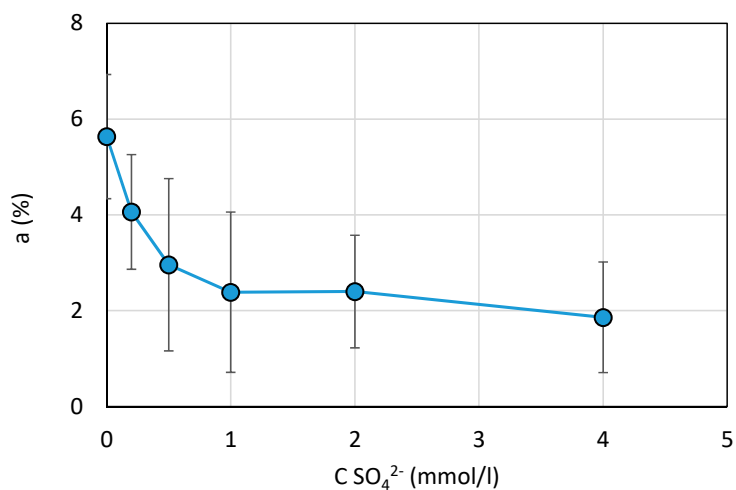

**Figure S8.** Effect of the SO<sub>4</sub><sup>2-</sup> concentration on the sorption of SFF (0.1 mmol/l) on the catalytic system (0.5 g TiO<sub>2</sub>/l / 1.0 mmol FeCl<sub>3</sub>/l) at pH 3.0±0.1

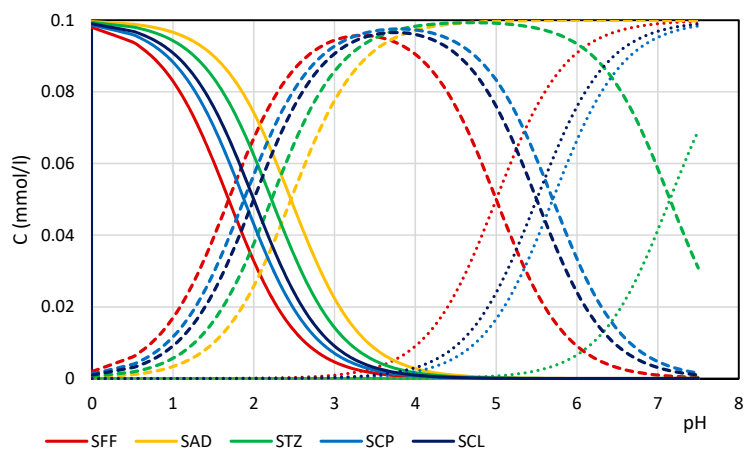

**Figure S9.** Effect of the pH on the dissociation and the concentration of molecular form of SNs (0.1 mmol/l) in aqueous solution: cationic form ( $\text{SH}_2^+$ ) – solid line, neutral form ( $\text{SH}$ ) – dashed line, anionic form ( $\text{S}^-$ ) – dotted line

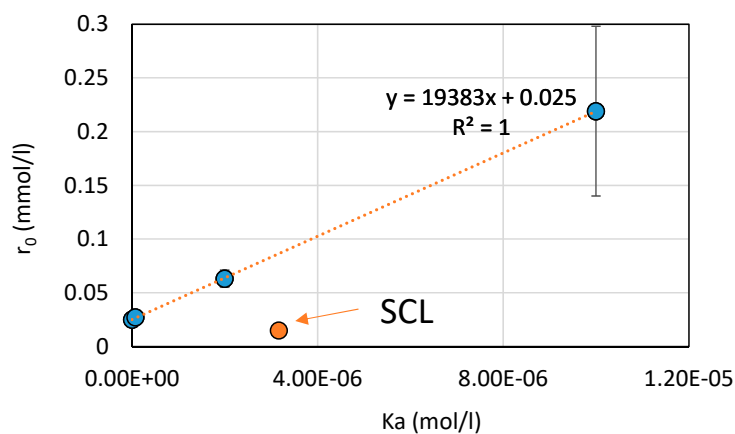

**Figure S10.** Relationship between the photodegradation rate of SNs (0.1 mmol/l) in the presence of a  $\text{TiO}_2$ (0.5 g/l)/ $\text{FeCl}_3$ (1.0 mmol/l) mixture and their dissociation constants ( $K_a$ )

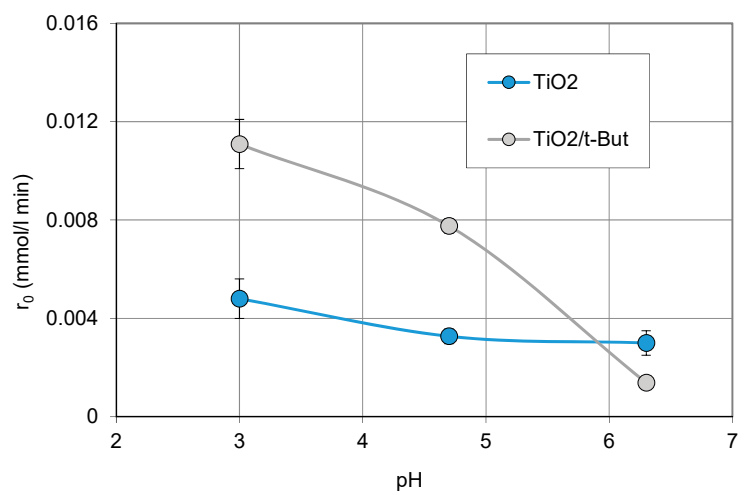

**Figure S11.** Effect of the pH on the initial rate of SFF photodegradation (0.1 mmol/l) in the presence of  $\text{TiO}_2$  (0.5 g/l) or a  $\text{TiO}_2$  (0.5 g/l)/t-But (10 mmol/l) mixture

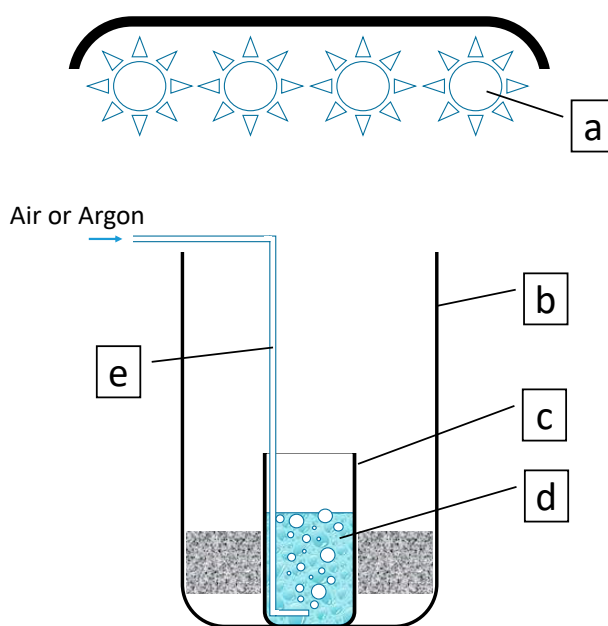

**Figure S12.** Test stand for the photocatalytic experiments under aerobic and anaerobic conditions, (a) UVA lamps; (b) a glass beaker (5000 ml); (c) a glass beaker (250 ml) (d) SN solution (150 ml, 0.1 mmol/l) with the selected catalyst system; (e) a glass tube (drain)

**Table S5.** Concentrations of substances used in studies of the photocatalytic degradation of SNs

| Chemicals                                 | Concentration<br>(mmol/l) |
|-------------------------------------------|---------------------------|
| tert-Butanol (t-But)                      | 10                        |
| methanol                                  | 10                        |
| $\text{CrCl}_3 \cdot 6\text{H}_2\text{O}$ | 1.0                       |
| $\text{AlCl}_3 \cdot 6\text{H}_2\text{O}$ | 1.0                       |
| $\text{CuCl}_2 \cdot 2\text{H}_2\text{O}$ | 1.0                       |
| $\text{Na}_2\text{SO}_4$                  | 3.0                       |

**Table S6.** Detailed data for the UPLC procedure (gradient table).

|                                                                                  | Time<br>(min) | Flow rate<br>(ml/min) | %A<br>H <sub>2</sub> O with 0.01% HCOOH | %B<br>CH <sub>3</sub> CN with 0.01% HCOOH |
|----------------------------------------------------------------------------------|---------------|-----------------------|-----------------------------------------|-------------------------------------------|
| for SFF,SCL and SCP; ACQUITY UPLC BEH C18 column (130Å, 1.7 µm, 2.1 mm x 100 mm) |               |                       |                                         |                                           |
| 1.                                                                               | 0             | 0.350                 | 95.0                                    | 5.0                                       |
| 2.                                                                               | 3.5           | 0.350                 | 80.0                                    | 20.0                                      |
| 3.                                                                               | 6.5           | 0.350                 | 50.0                                    | 50.0                                      |
| 4.                                                                               | 7.5           | 0.350                 | 50.0                                    | 50.0                                      |
| 5.                                                                               | 8.5           | 0.350                 | 95.0                                    | 5.0                                       |
| for SAD and STZ; ACQUITY UPLC BEH C18 column (130Å, 1.7 µm, 2.1 mm x 50 mm)      |               |                       |                                         |                                           |
| 1.                                                                               | 0             | 0.350                 | 95.0                                    | 5.0                                       |
| 2.                                                                               | 3.0           | 0.350                 | 60.0                                    | 40.0                                      |
| 3.                                                                               | 3.3           | 0.350                 | 20.0                                    | 80.0                                      |
| 4.                                                                               | 3.5           | 0.350                 | 95.0                                    | 5.0                                       |

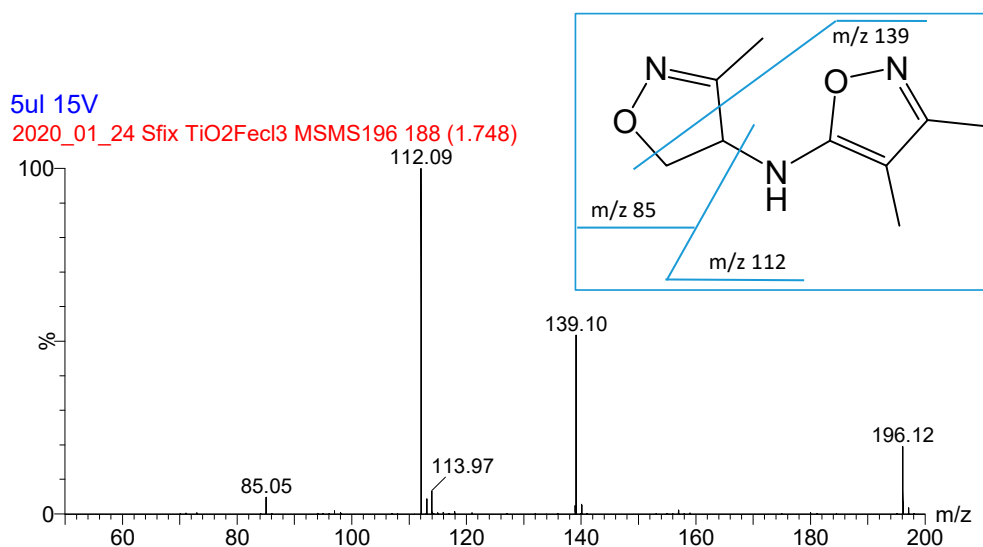**Figure S13.** MSMS spectrum and a possible formula of compound with m/z 196.1086 Da occurred in SFF solution after irradiation for 90 s in the presence of a TiO<sub>2</sub>/FeCl<sub>3</sub> mixture
